# Supplementary material
Source: PubMed Central journal article supplement (PMC3594702)
Supplement: NIHMS52125-supplement-01.pdf [file NIHMS52125-supplement-01.pdf]

# Supporting Online Material for

## **p27<sup>kip1</sup> stabilization is essential for the maintenance of cell cycle arrest in response to DNA damage**

Myriam Cuadrado<sup>1,3</sup>, Paula Gutierrez-Martinez<sup>1,3</sup>, Aneta Swat<sup>2</sup>, Angel R. Nebreda<sup>2</sup> and Oscar Fernandez-Capetillo<sup>1\*</sup>.

<sup>1</sup>Genomic Instability Group; Spanish National Cancer Research Centre (CNIO); Madrid; 28029, Spain.

<sup>2</sup>Signalling and Cell Cycle Group; Spanish National Cancer Research Centre (CNIO); Madrid; 28029, Spain

<sup>3</sup>Equal contributors.

**Note:** M.Cuadrado and P. Gutierrez-Martinez share the first authorship.

\*To whom correspondence should be addressed. Phone: +34-91-7328000 Ext: 3480. E-mail: [ofernandez@cnio.es](mailto:ofernandez@cnio.es)

**Figure S1. p27 mRNA levels do not increase upon DNA damage.** Q-RTPCR of p27 levels from A549 cells before and after a 24 hr exposure to Dox. Data were normalized with GAPDH levels. Data represent the mean and s.d. from three independent experiments.

*Cuadrado et al Figure S1*

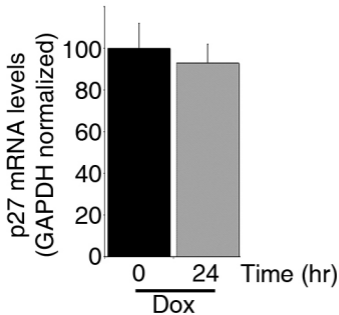

**Figure S2. DNA Repair is not affected by p27 levels.** (A) Reporter substrate for analysis of NHEJ. The reporter substrate consists of a split GFP with an artificially engineered intron, interrupted by an adenoviral exon, flanked by restriction sites for induction of DSBs. In this construct, the GFP gene is inactive; however, upon digestion with *HindIII* and successful NHEJ, the construct becomes GFP (1). (B) The percentage of successful NHEJ in p27<sup>wt</sup> and p27<sup>low</sup> cells was measured as described in (A) by transfection of a *HindIII*-linearized reporter substrate. The numbers represent the number of GFP cells, normalized for the transfection efficiency by co-transfection with a DsRed expressing plasmid (and relative to the levels found in p27<sup>wt</sup> cells). (C) The image illustrates the dynamics of H2AX phosphorylation in p27<sup>wt</sup> and p27<sup>low</sup> cells that have been exposed to the radiomimetic drug neocarzinostatin for one hour (100ng/ml) and then released into drug-free media. Images were acquired by a High-Throughput microscopy platform each of the dots indicating the signal of  $\gamma$ H2AX per individual nucleus. (D) Examples from the analyses shown in (C). Scale bar (white) indicates 20  $\mu$ m.

**A**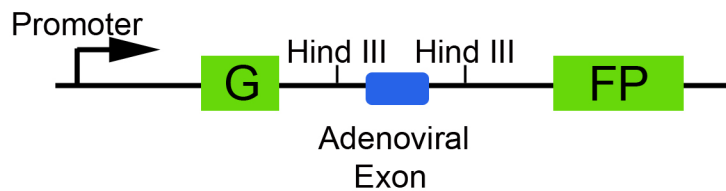**B**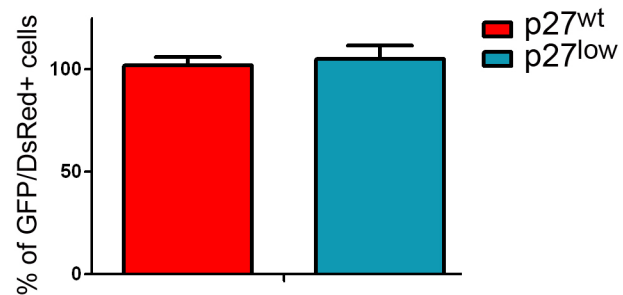**C**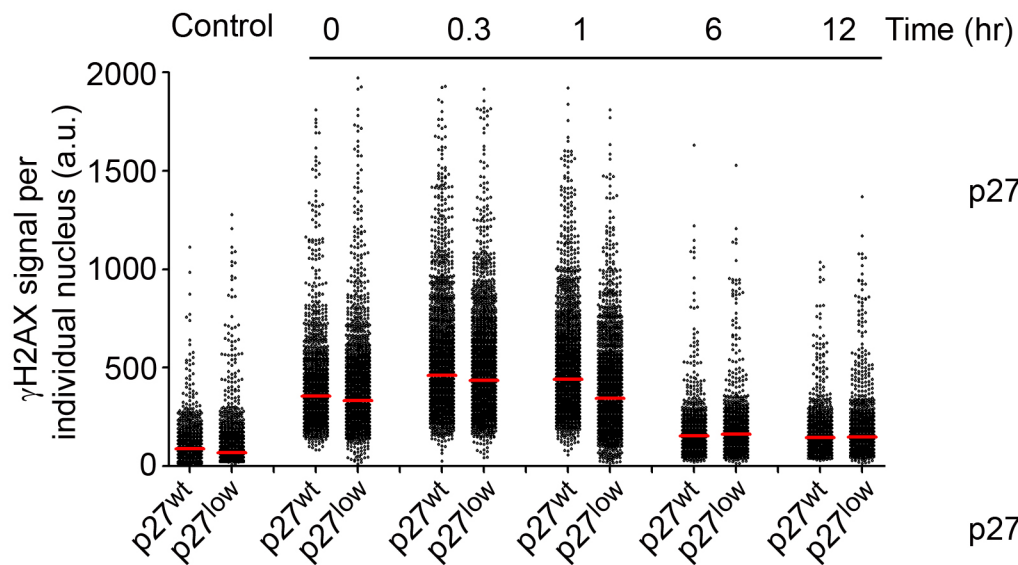**D**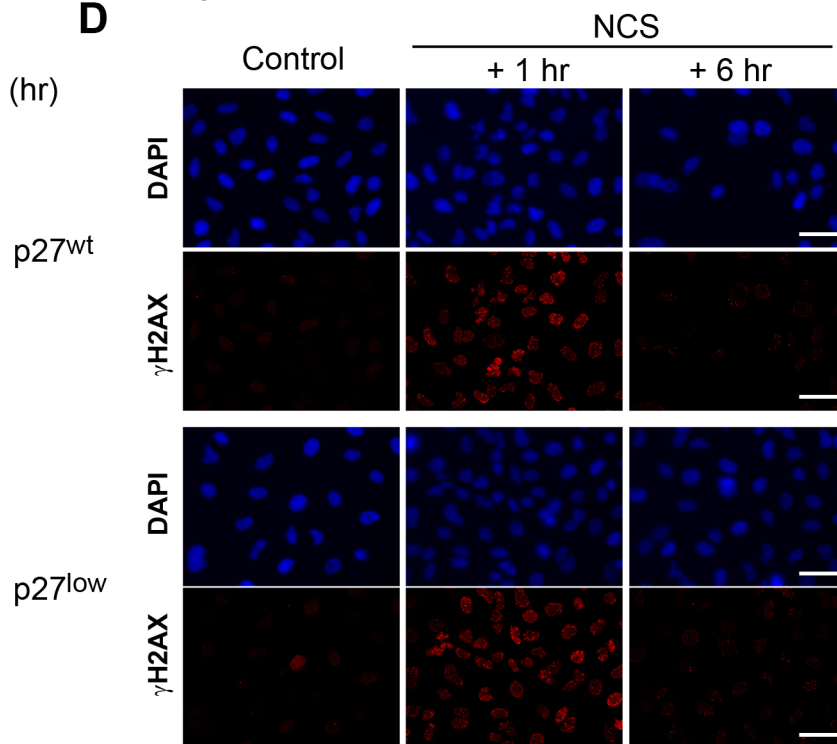

**Figure S3. p27 depleted cells enter S phase with DNA breaks.** Immunofluorescence data of p27<sup>wt</sup> and p27<sup>low</sup> cells co-stained with  $\gamma$ H2AX (red) and EdU (green) in cells that have been exposed (or not exposed) to Dox for 24 hrs and then released for another 24 hrs in drug-free medium. White arrows indicate cells in S phase (EdU positive) in each of the conditions. Scale bar (white) indicates 10  $\mu$ m.

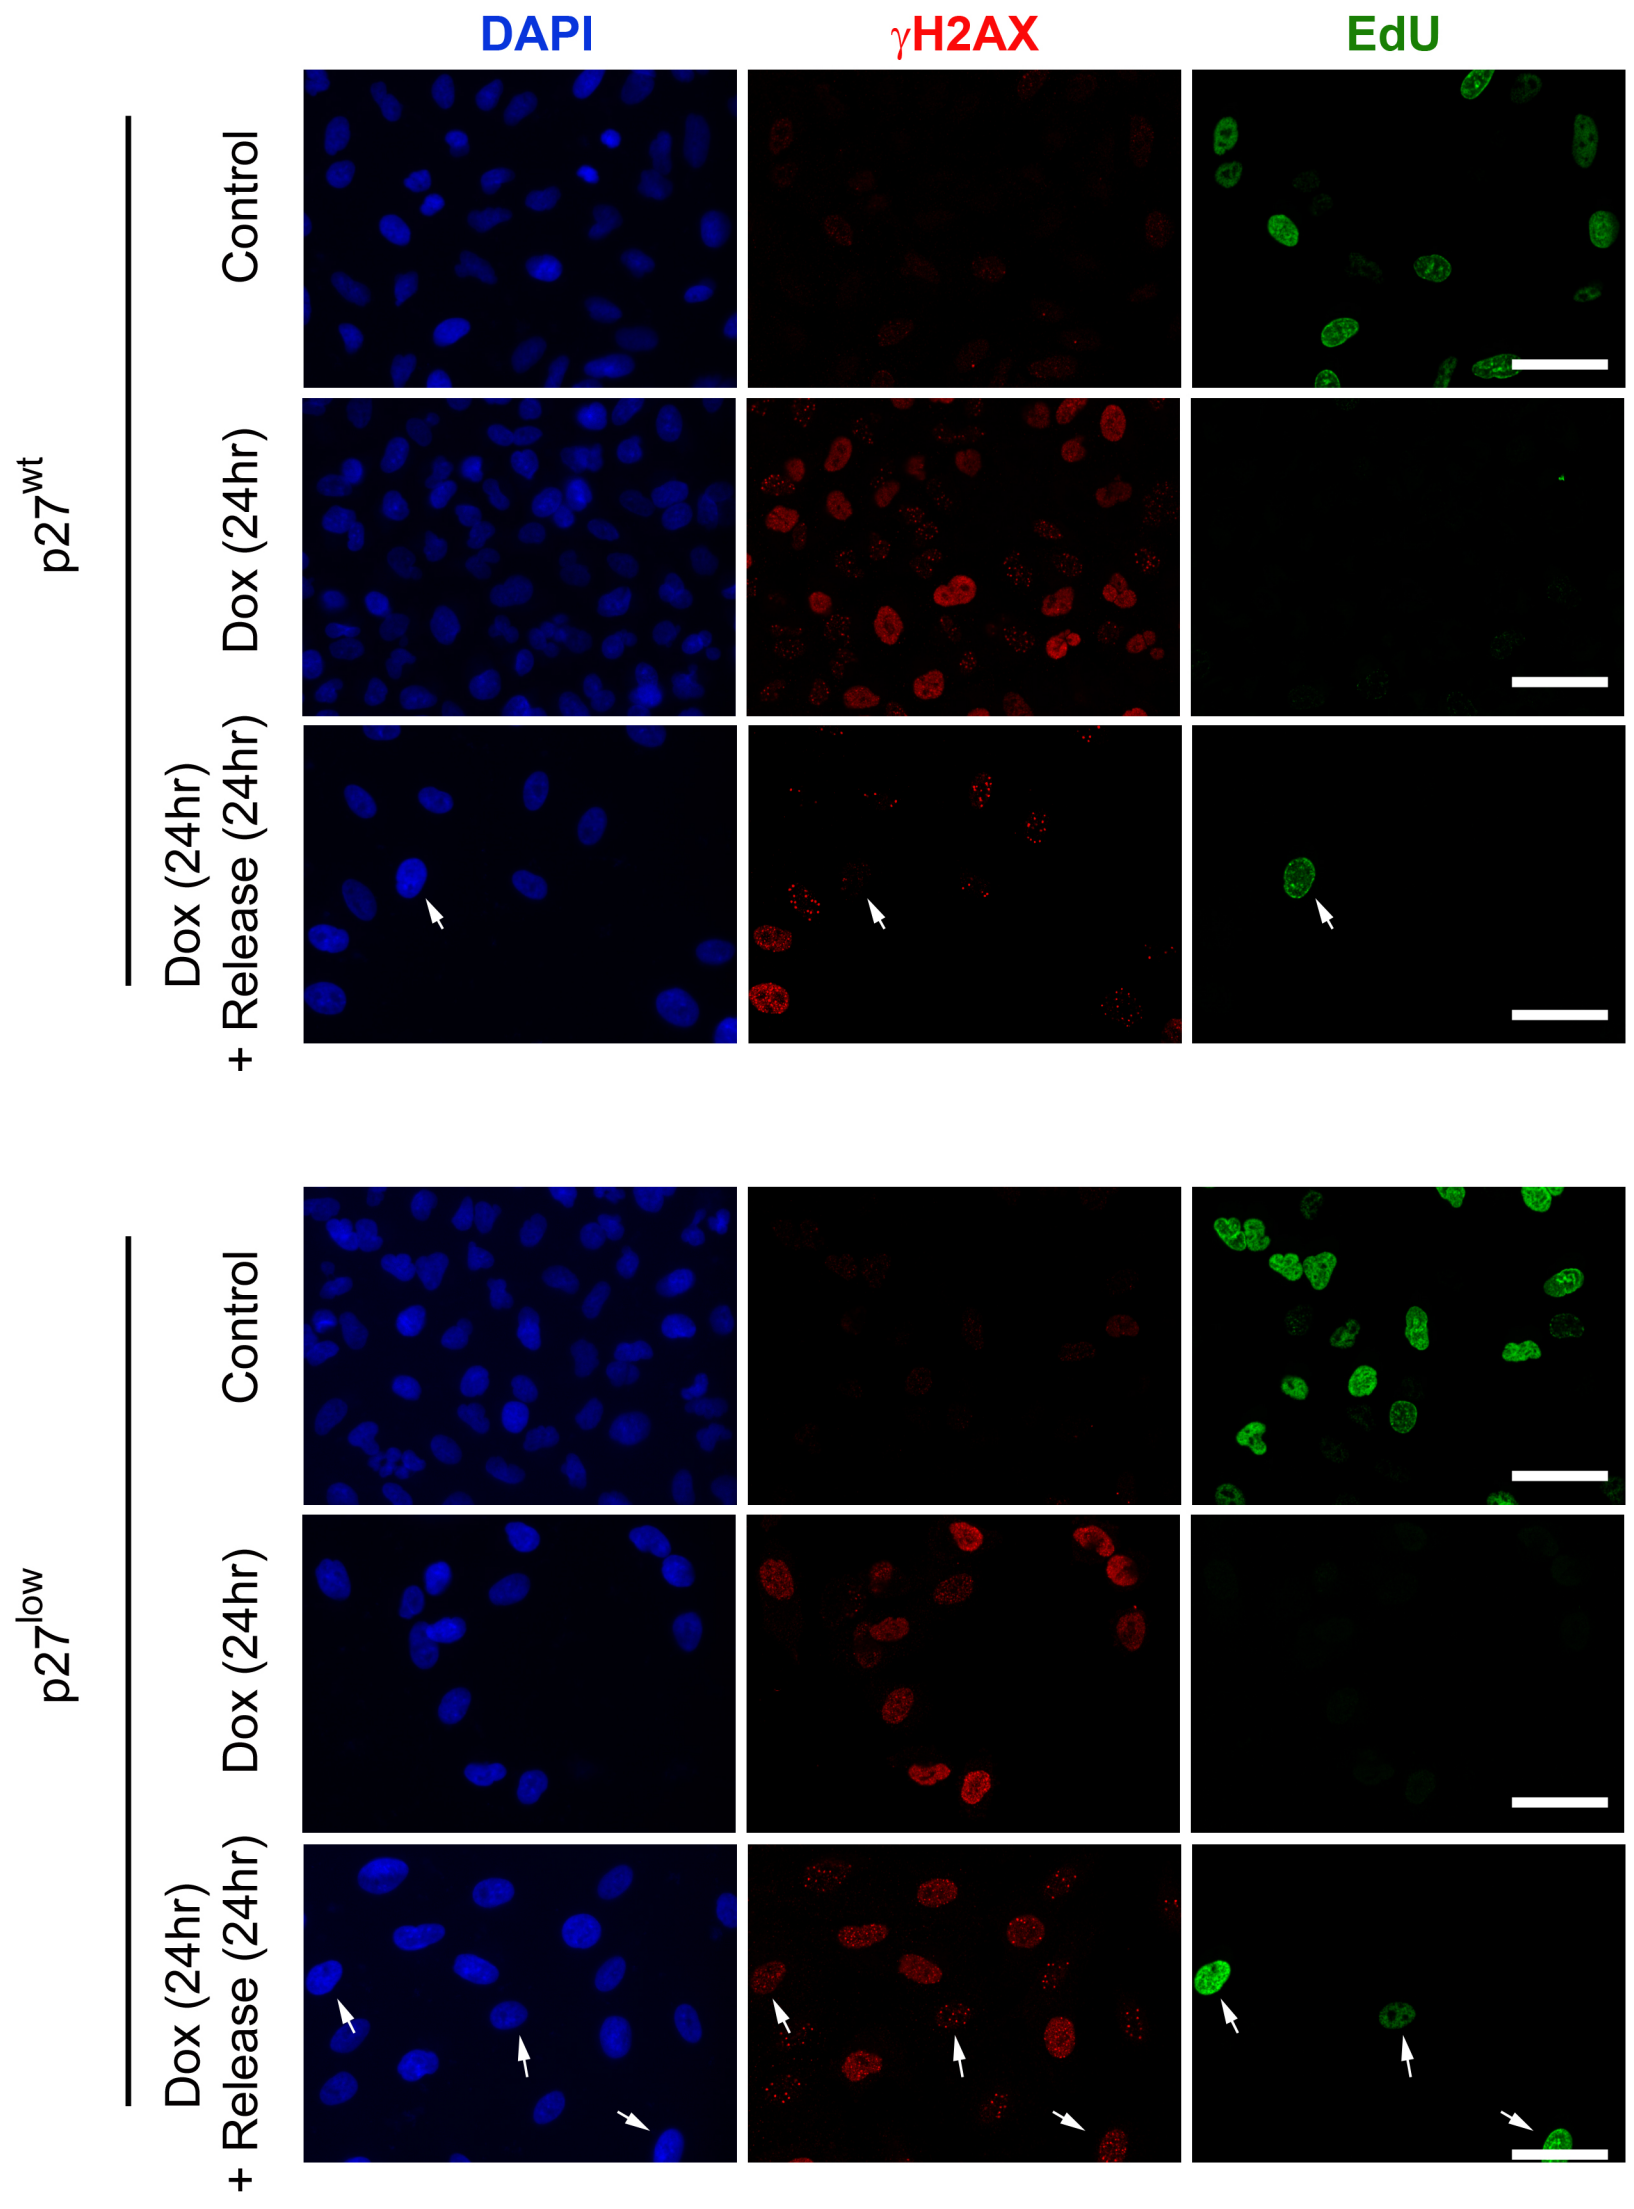

**Figure S4. Chromosomal abnormalities found in p27<sup>low</sup> cells.** The figure provides several examples of Giemsa stained karyotypes illustrating the chromosomal abnormalities that were found on p27<sup>low</sup> cells upon exposure to Dox for 24 hrs and then released for another 24 hrs in drug-free medium (as shown, no abnormalities were observed in either treated or untreated p27<sup>wt</sup> cells or untreated p27<sup>low</sup> cells). The most frequent observation was chromosomal fragments (as indicated by red asterisks).



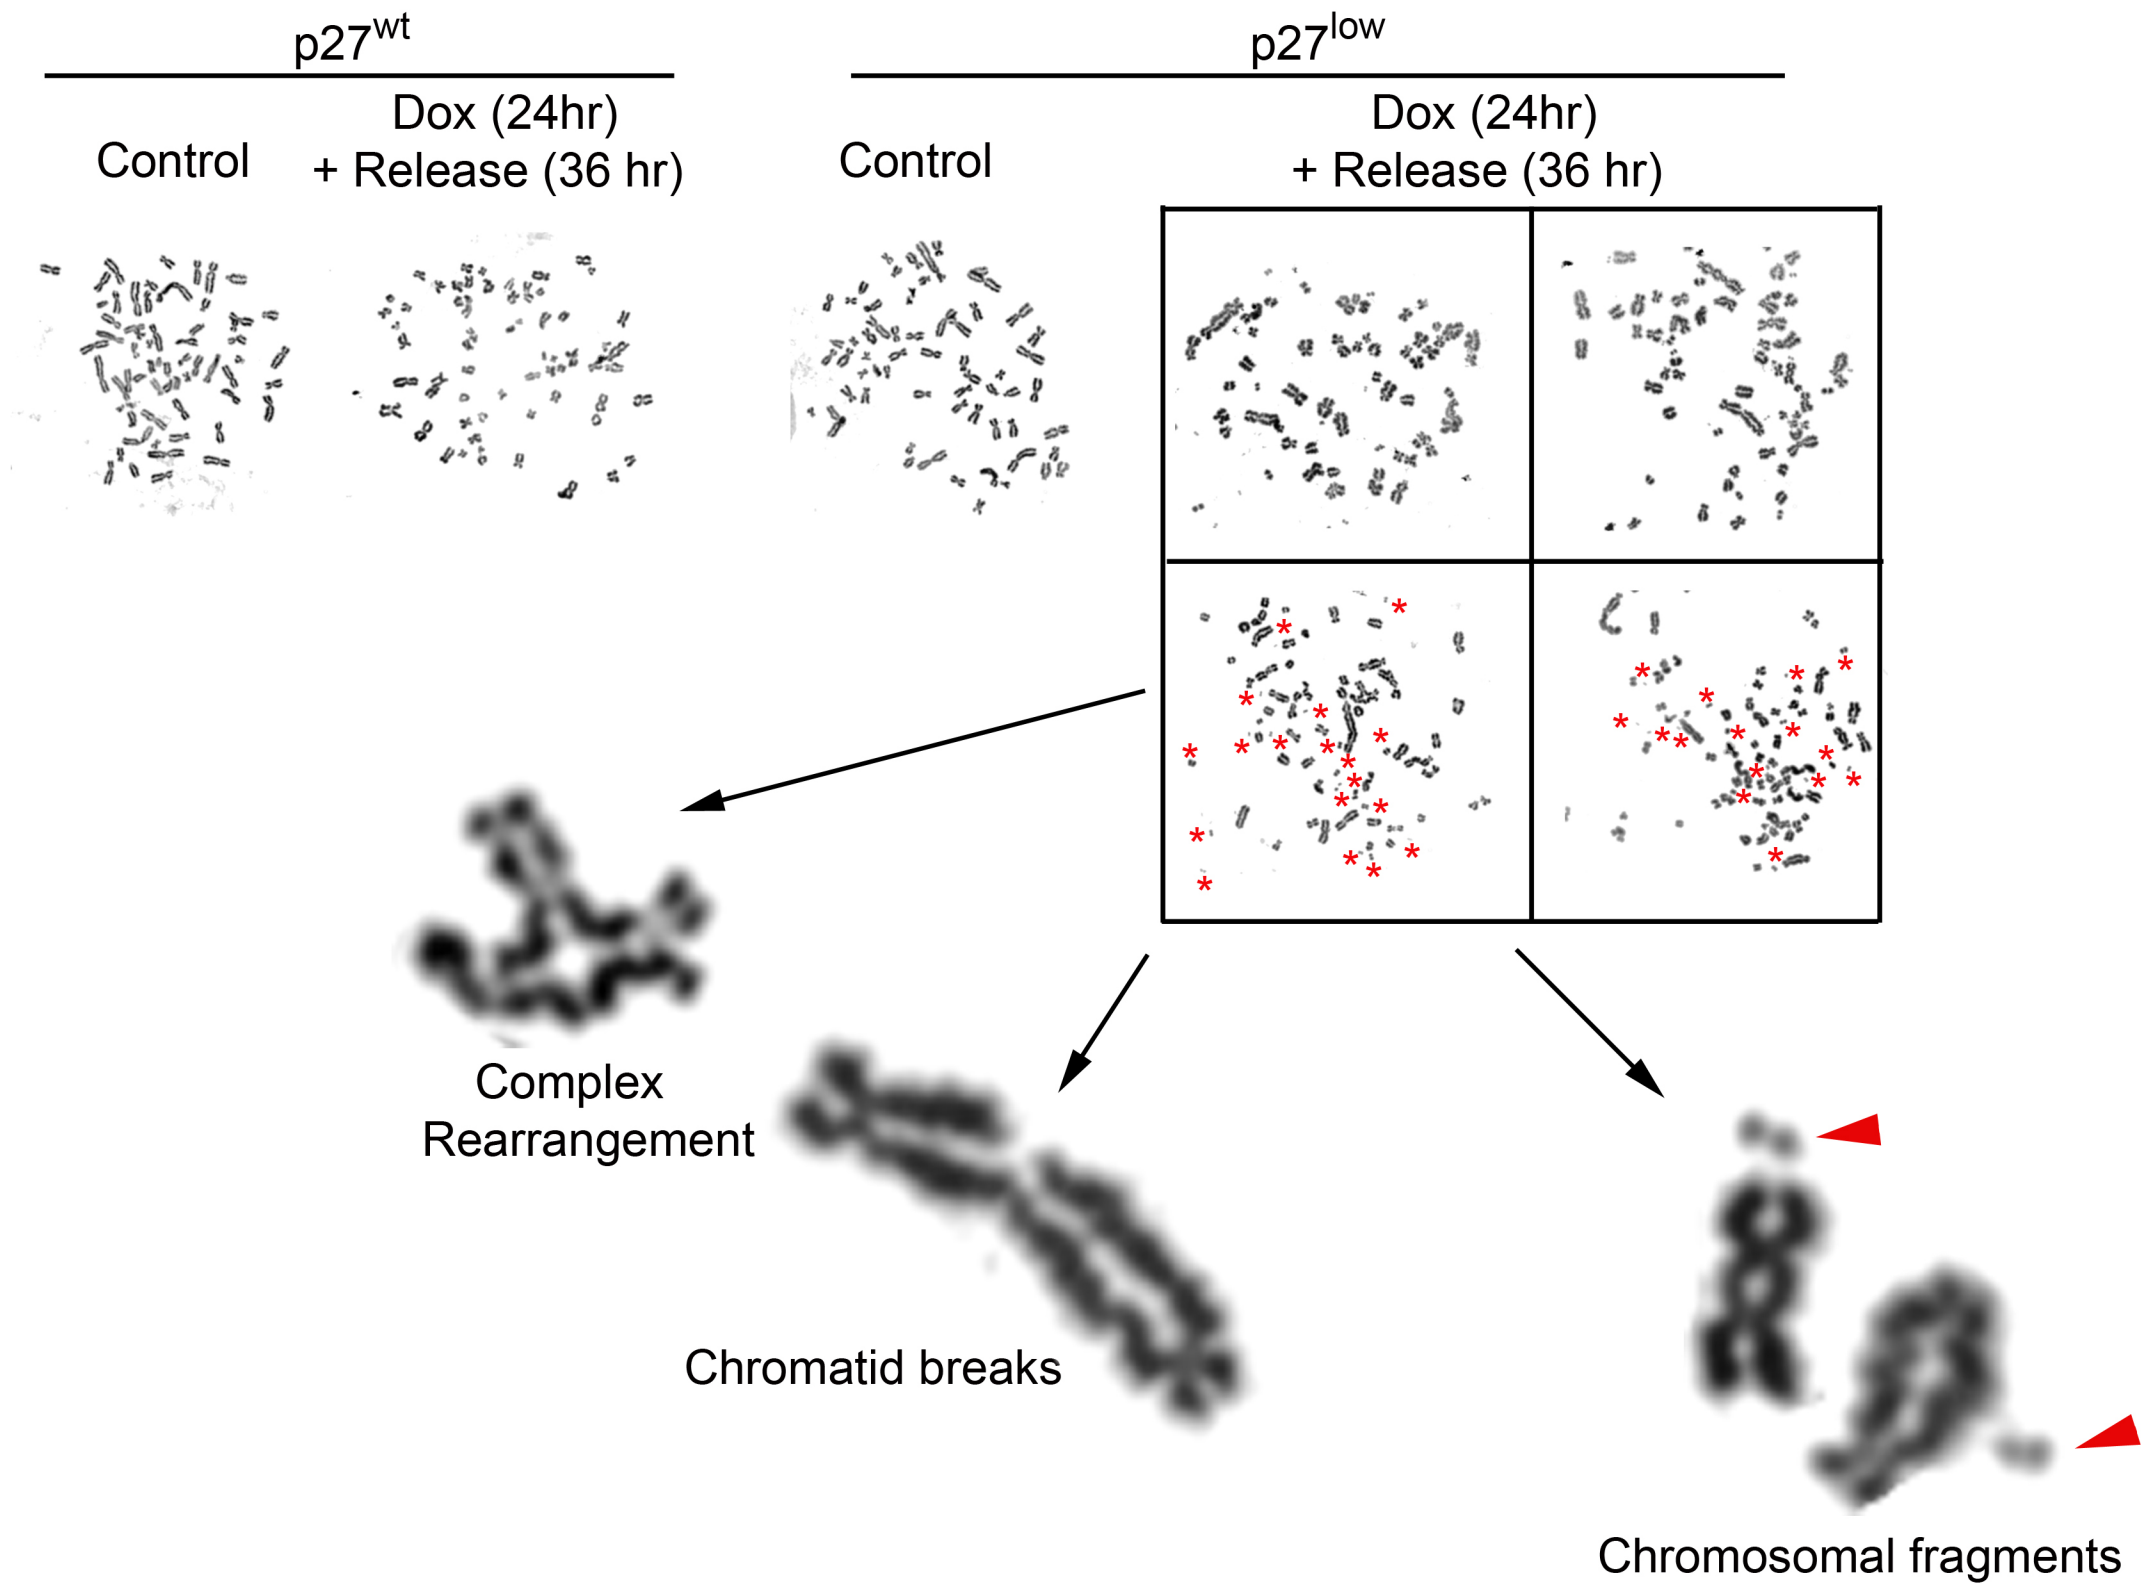

**Figure S5. Putative ATM/ATR phosphorylation sites on p27.** Schema illustrating the presence of putative ATM/ATR sites (red balls) on the N-terminus of p27 (as identified on [www.scansite.edu](http://www.scansite.edu)). Note that such potential sites are located exclusively in almost every peak of surface exposed regions of the N-terminus.

*Cuadrado et al Figure S5*

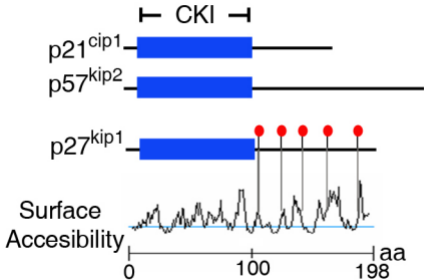

**Figure S6. DNA damage induced ROS does not mediate p27 stabilization.** (A) The levels of ROS were detected by flow cytometry with the ROS-detecting probe 2',7'-dichlorodihydrofluorescein diacetate. Cells were treated with Dox for 24 hrs as in the rest of the experiments shown, in the absence or presence of the ROS scavengers L-Glutathion and N-acetyl-Cysteine (both at 5mM). As shown, the dose used for the ROS scavengers is able to eliminate the levels of ROS induced by the Dox treatment. As a positive control, cells were treated with 5mM H<sub>2</sub>O<sub>2</sub> for 6 hrs. (B) Western blot illustrating the levels of p27 on A549 exposed to Dox for 24 hrs, in the absence or presence of the ROS scavengers L-Glutathion and N-acetyl-Cysteine at the doses used in (A).

**A**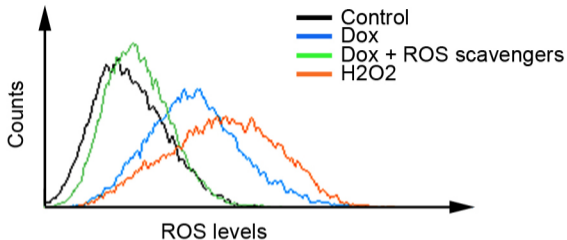**B**

|                |   |   |   |   |
|----------------|---|---|---|---|
| ROS scavengers | - | - | + | + |
| Dox (24 hr)    | - | + | - | + |

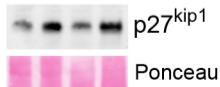

## SUPPLEMENTARY METHODS

**NHEJ Assay.** The assay used to specifically measure NHEJ was described in (1). In brief, the NHEJ reporter plasmid was digested with *HindIII* for 6 h and purified by using a Qiagen gel extraction kit. Aliquots were analyzed by gel electrophoresis to confirm complete digestion.  $10^6$  cells were transfected with 1  $\mu$ g of predigested NHEJ reporter substrate along with 1  $\mu$ g of pDsRed2-N1 (Clontech) to serve as transfection control. Expression of GFP and DsRed was monitored by FACS 48 hrs after transfection.

**Immunofluorescence and HT microscopy.** The HT-microscopy mediated analysis of  $\gamma$ H2AX has been described before (2). Briefly, cells were grown on  $\mu$ CLEAR bottom 96 well dishes (Greiner Bio-One), and analyzed on a BD Pathway<sup>TM</sup> 855 BioImager (Beckton Dickinson). Image analysis was performed with the AttoVision software (Beckton Dickinson). All the images for quantitative analyses were acquired under non-saturating exposure conditions.  $\gamma$ H2AX antibodies (Upstate Biotechnology) together with secondary antibodies conjugated with Alexa 488 (Molecular probes) were used. For EdU and  $\gamma$ H2AX immunostainings, *Click-IT EdU* was used according to manufacturer's instructions (Invitrogen).

**Analysis of ROS levels.** Intracellular ROS levels were measured with the ROS-reacting dye 2',7'-dichlorodihydrofluorescein diacetate (SIGMA). Briefly, after treatment cells were washed in PBS and incubated at 37°C for 10 min with a PBS-buffered solution containing 5.5 mM glucose and 10  $\mu$ M of the probe. Cells were then washed in PBS, fixed for 10 min in 4% paraformaldehyde and finally suspended in PBS before going to the cytometer.

## **SUPPLEMENTARY REFERENCES**

- 1. Seluanov A, Mittelman D, Pereira-Smith OM, Wilson JH, Gorbunova V. DNA end joining becomes less efficient and more error-prone during cellular senescence. Proc Natl Acad Sci U S A 2004; 101: 7624-9.**
- 2. Murga M, Jaco I, Fan Y, et al. Global chromatin compaction limits the strength of the DNA damage response. J Cell Biol 2007; 178: 1101-8.**
